# Supplementary material for: A systematic review of the effectiveness of self-management interventions in people with multiple sclerosis at improving depression, anxiety and quality of life
Source: PubMed Central journal article supplement (PMC5636105; doi:10.1371/journal.pone.0185931), 2017-10-11
Supplement: pone.0185931.s001.pdf [file pone.0185931.s001.pdf]

## Supporting information

### S1 Table. Example search string using Medline

Platform EBSCO Database Medline Limits 2000-2016; Human.

|     |                                                    |
|-----|----------------------------------------------------|
| S1  | self*care.ab.ti                                    |
| S2  | self*manag*.ab.ti                                  |
| S3  | self*monitor*.ab.ti                                |
| S4  | self*help.ab.ti                                    |
| S5  | OR/S1-S4                                           |
| S6  | (MH "Multiple Sclerosis+")                         |
| S7  | (MH "Myelitis")                                    |
| S8  | (MH "Myelitis, Transverse")                        |
| S9  | (MH "Demyelinating Autoimmune Diseases,<br>CNS")   |
| S10 | (MH "Multiple Sclerosis, Chronic<br>Progressive")  |
| S11 | (MH "Multiple Sclerosis, Relapsing-<br>Remitting") |
| S12 | multiple N6 Sclerosis ti.ab                        |
| S13 | OR/S6-S12                                          |
| S14 | S5 and S13                                         |

#### Key

Ti- title word

Ab - abstract word

MH - Main index/ MeSH term
